# Supplementary material for: Activation of parkin by a molecular glue
Source: PubMed Central journal article supplement — Nat Commun. 2024 Sep 19;15:7707. doi: 10.1038/s41467-024-51889-3 (PMC11412986; doi:10.1038/s41467-024-51889-3), 2024-09-19
Supplement: 41467_2024_51889_MOESM1_ESM.pdf [file 41467_2024_51889_MOESM1_ESM.pdf]

*Supplementary Information for*

## ACTIVATION OF PARKIN BY A MOLECULAR GLUE

Véronique Sauvé<sup>1,2</sup>, Eric Stefan<sup>3</sup>, Nathalie Croteau<sup>2,4,5,6</sup>, Thomas Goiran<sup>7</sup>, Rayan Fakih<sup>1,2</sup>, Nupur Bansal<sup>3</sup>, Adelajda Hadzipasic<sup>3,^</sup>, Jing Fang<sup>3,#</sup>, Paramasivam Murugan<sup>3,§</sup>, Shimin Chen<sup>3,+</sup>, Edward A. Fon<sup>5,7</sup>, Warren D. Hirst<sup>8,‡</sup>, Laura F. Silvian<sup>3,\*</sup>, Jean-François Trempe<sup>2,4,5,6</sup>, Kalle Gehring<sup>1,2,\*</sup>

<sup>1</sup>Department of Biochemistry, McGill University, Montreal, QC H3G 0B1, Canada

<sup>2</sup>Centre de Recherche en Biologie Structurale, McGill University, Montreal, QC H3G 0B1, Canada

<sup>3</sup>Biotherapeutics and Medicinal Sciences, Biogen, Cambridge, MA 02142, USA

<sup>4</sup>Department of Pharmacology & Therapeutics, McGill University, Montreal, QC H3G 1Y6, Canada

<sup>5</sup>Structural Genomics Consortium, McGill University, Montreal, QC H3A 2B4, Canada

<sup>6</sup>Brain Repair and Integrative Neuroscience (BRaIN) Program, Research Institute of the McGill University Health Centre, Montreal, QC H3H 2R9, Canada

<sup>7</sup>McGill Parkinson Program, Montreal Neurological Institute, McGill University, Montreal, QC H3A 2B4, Canada

<sup>8</sup>Neurodegenerative Disease Research Unit, Biogen, Cambridge, MA 02142, USA

Current addresses: <sup>^</sup>Novartis Institutes for Biomedical Research; <sup>#</sup>Aura Biosciences; <sup>§</sup>Bristol-Myers Squibb; <sup>+</sup>Leroy T. Canoles Jr. Cancer Research Center, Eastern Virginia Medical School, <sup>‡</sup>DaCapo Brainscience

\*Correspondence: [laura.silvian@biogen.com](mailto:laura.silvian@biogen.com), [kalle.gehring@mcgill.ca](mailto:kalle.gehring@mcgill.ca)

**Supplementary Table 1. Isothermal titration calorimetry data collection and fitting**

| Cell sample <sup>1</sup>                                    | Syringe sample             | $\chi^2/\text{DoF}$ | Number of sites   | $K_a$ ( $M^{-1}$ )  | $\Delta H$ (cal/mol)  | $\Delta S$ (cal/mol/deg) |
|-------------------------------------------------------------|----------------------------|---------------------|-------------------|---------------------|-----------------------|--------------------------|
| R0RB (21 $\mu M$ ) + pUb (2 $\times$ , 48 $\mu M$ )         | BIO-2007817 (165 $\mu M$ ) | 3.22E4              | 1.07 $\pm$ 0.002  | 9.69E7 $\pm$ 1.7E7  | -1.052E4 $\pm$ 47.6   | 0.664                    |
| R0RB (20 $\mu M$ ) + pUb (2 $\times$ , 45 $\mu M$ )         | BIO-2007818 (166 $\mu M$ ) | 705.9               | 1.20 $\pm$ 0.003  | 6.54E5 $\pm$ 1.58E4 | -5368 $\pm$ 20.68     | 8.30                     |
| R0RB (20 $\mu M$ )                                          | BIO-2007817 (166 $\mu M$ ) | 1.66E4              | 1 (fixed)         | 1.21E4 $\pm$ 1.6E3  | -1.820E4 $\pm$ 1.65E3 | -43.4                    |
| R0RB (K211N) (16 $\mu M$ ) + pUb (25 $\mu M$ )              | BIO-2007817 (166 $\mu M$ ) | 1.82E4              | 1 (fixed)         | 2.55E4 $\pm$ 1.2E3  | -2.894E4 $\pm$ 760    | -78.5                    |
| R0RB (17 $\mu M$ ) + pUbl (25 $\mu M$ )                     | BIO-2007817 (166 $\mu M$ ) | 6173                | 1.13 $\pm$ 9.0E-4 | 9.09E7 $\pm$ 5.1E6  | -1.001E4 $\pm$ 17.6   | 2.26                     |
| R0RB (20 $\mu M$ ) + pUbl-ACT (25 $\mu M$ )                 | BIO-2007817 (166 $\mu M$ ) | 5440                | 1.09 $\pm$ 0.003  | 8.08E6 $\pm$ 5.3E5  | -5498 $\pm$ 23.9      | 12.9                     |
| R0RB (F146Y) (20 $\mu M$ ) + pUb (2 $\times$ , 45 $\mu M$ ) | BIO-2007817 (166 $\mu M$ ) | 2553                | 1.16 $\pm$ 0.003  | 1.13E6 $\pm$ 3.0E4  | -5712 $\pm$ 20        | 8.21                     |
| R0RB (9 $\mu M$ )                                           | pUbl (200 $\mu M$ )        | 1.4E4               | 0.806 $\pm$ 0.012 | 6.05E5 $\pm$ 3.5E4  | -1.064E4 $\pm$ 214    | -9.83                    |
| R0RB (4.5 $\mu M$ ) + BIO-2007817 (200 $\mu M$ )            | pUbl (100 $\mu M$ )        | 6.7E4               | 0.99 $\pm$ 0.003  | 1.29E9 $\pm$ 6.6E8  | -1.397E4 $\pm$ 95     | -5.94                    |

<sup>1</sup>Constructs derived from the sequence of rat parkin

**Supplementary Table 2. Data collection and refinement statistics**

---

|                                                     |                           |
|-----------------------------------------------------|---------------------------|
|                                                     | R0RB:2xpUb:BIO-1975900    |
|                                                     | PDB: 8W31                 |
| <hr/>                                               |                           |
| <b>Data collection</b>                              |                           |
| Space group                                         | P6 <sub>1</sub> 22        |
| Cell dimensions                                     |                           |
| <i>a</i> , <i>b</i> , <i>c</i> (Å)                  | 83.54, 83.54, 258.77      |
| $\alpha$ , $\beta$ , $\gamma$ (°)                   | 90, 90, 120               |
| Resolution (Å)                                      | 48.22-2.50 (2.59-2.50)    |
| <i>R</i> <sub>merge</sub>                           | 0.11 (2.94)               |
| <i>I</i> / $\sigma$ <i>I</i>                        | 24.08 (1.72)              |
| Completeness (%)                                    | 99.98 (100.00)            |
| Redundancy                                          | 38.3 (40.7)               |
| <br>                                                |                           |
| <b>Refinement</b>                                   |                           |
| Resolution (Å)                                      | 2.50                      |
| No. reflections                                     | 19414 (1881)              |
| <i>R</i> <sub>work</sub> / <i>R</i> <sub>free</sub> | 0.240/0.294 (0.411/0.474) |
| No. atoms                                           | 3051                      |
| Protein                                             | 2970                      |
| Zn                                                  | 6                         |
| BIO-1975900                                         | 37                        |
| Water                                               | 32                        |
| Glycerol                                            | 6                         |
| <i>B</i> -factors                                   |                           |
| Protein                                             | 89.26                     |
| Zn                                                  | 95.40                     |
| BIO-1975900                                         | 101.43                    |
| Water                                               | 71.38                     |
| Glycerol                                            | 90.03                     |
| R.m.s. deviations                                   |                           |
| Bond lengths (Å)                                    | 0.010                     |
| Bond angles (°)                                     | 1.281                     |

---

\*A single crystal was used to determine this structure

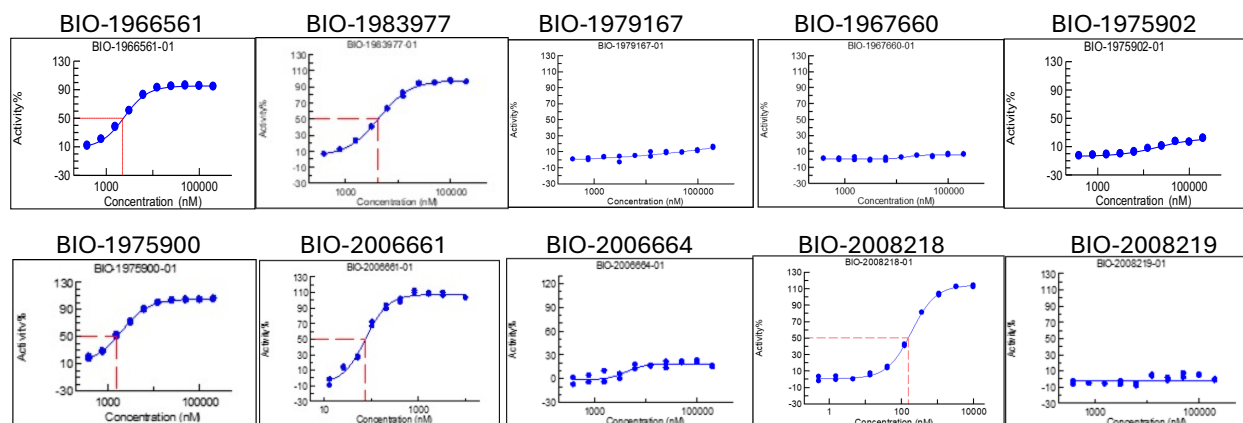

**Supplementary Fig. 1. Autoubiquitination activity profiles for related compounds.** Chemical structures and EC50 values are shown in main Figure 5.

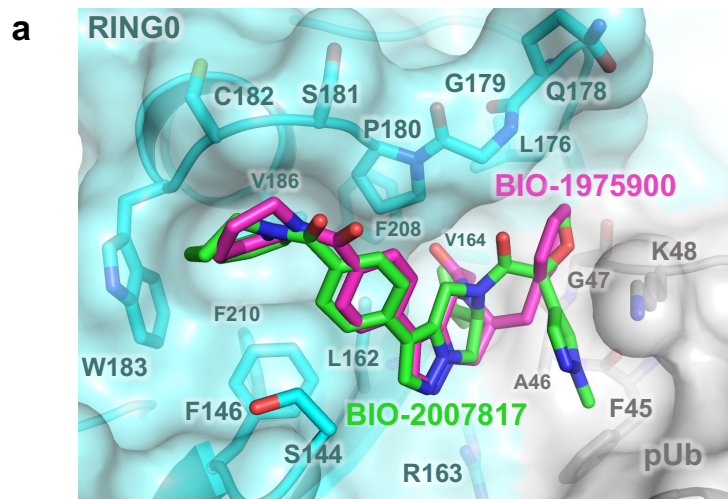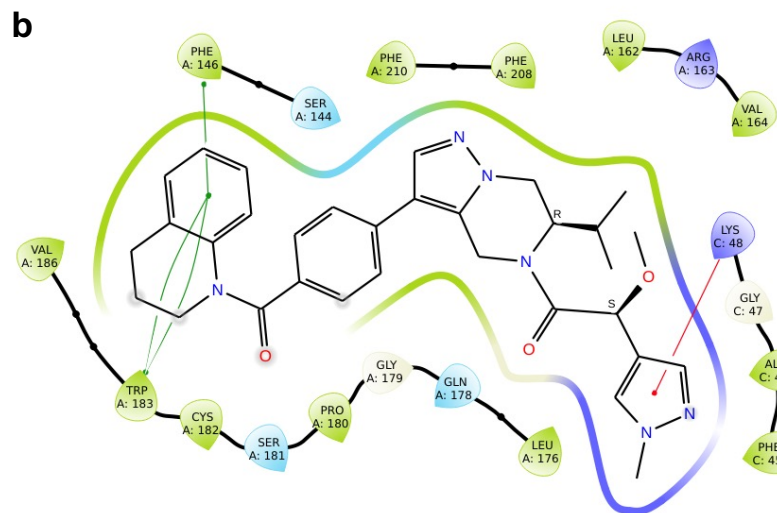

**Supplementary Fig. 2. BIO-2007817 binding to parkin. a,** Docking of BIO-2007817 into the R0RB:2xUb:BIO-1975900 crystal structure. **b,** Schematic of BIO-2007817 interactions.

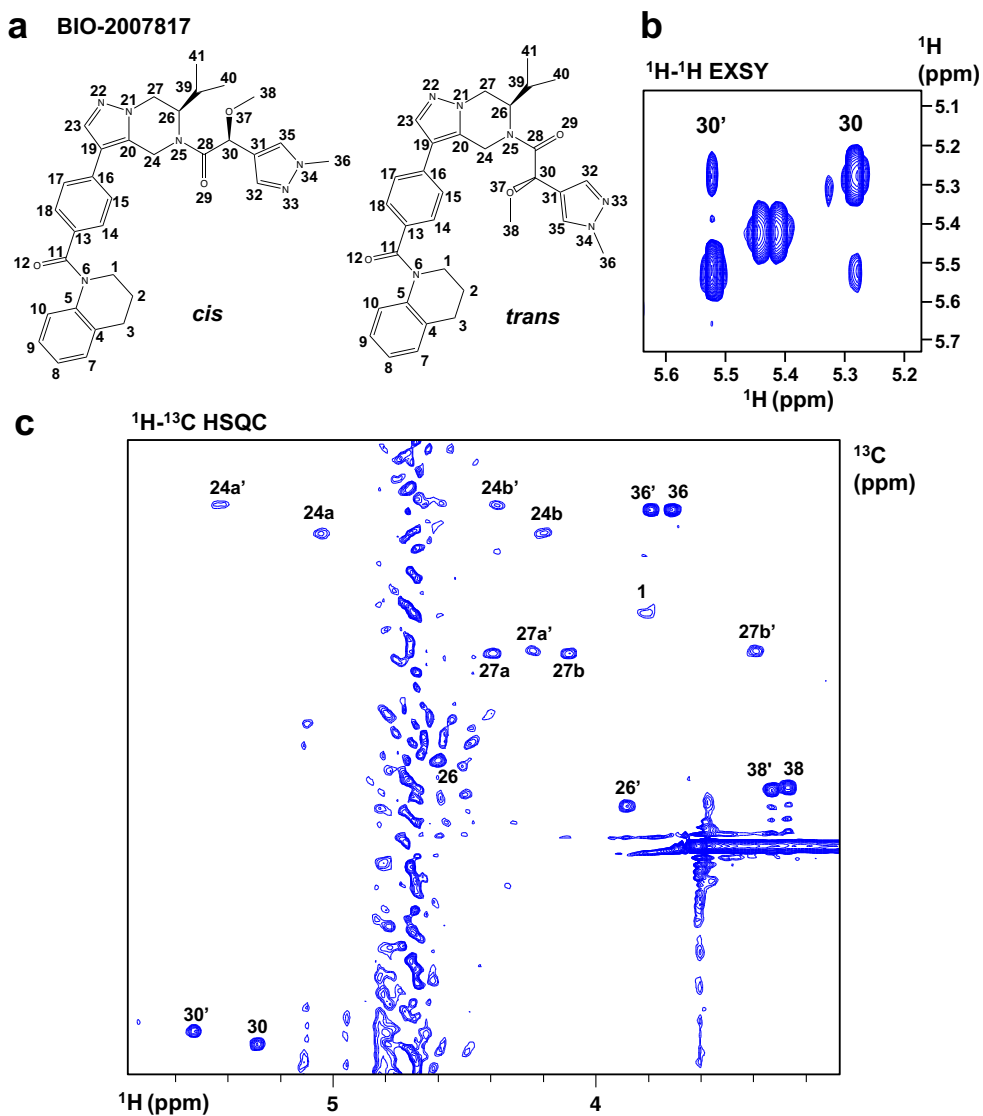

**Supplementary Fig. 3. NMR analysis of BIO-2007817 cis-trans isomerization.** **a**, Chemical structure and atom numbering of BIO-2007817, with the chemical bond between atom #25 and 28 in the *cis* or *trans* configuration. **b**,  $^1\text{H}$ - $^1\text{H}$  EXSY spectrum of BIO-2007817 in water (10%  $\text{D}_2\text{O}$ ) showing chemical exchange for the proton attached to the chiral center (#30), in proximity to the bond undergoing isomerization ('). Mixing time = 500 msec. **c**, Selected region of the  $^1\text{H}$ - $^{13}\text{C}$  HSQC spectrum of BIO-2007817 (natural abundance) in water (10%  $\text{D}_2\text{O}$ ). Peaks of  $^1\text{H}$ - $^{13}\text{C}$  pairs in proximity to the isomerization center show doublets, suggesting that the molecule adopts two distinct conformations.

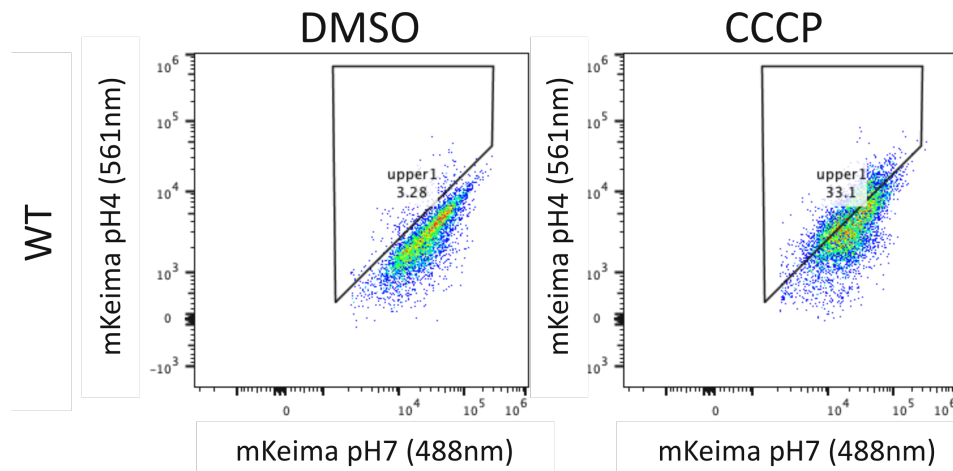

**Supplementary Fig. 4. Flow cytometry measurements of mitophagy.** Measurement of mitoKeima was made using a dual-excitation ratiometric pH calculation where pH 7 was detected through the excitation at 405 nm and pH 4 at 561 nm. For each sample, GFP-Parkin-positive, mt-Keima-405 nm-positive cells were gated and the percentage of cells with an increase in the 405:561 nm ratio in mt-Keima quantified. The percentage in treated cells minus the percentage in untreated cells was calculated as the induced parkin-mediated mitophagy and normalized to WT in each experimental set.

## Supplementary Methods

### Synthesis of compounds

All solvents and chemicals used were reagent grade. Anhydrous solvents were purchased from Sigma-Aldrich and used as received. Analytical thin layer chromatography (TLC) and silica gel column chromatography were performed on Merck silica gel 60 (230-400 mesh). Removal of solvents was conducted by using a rotary evaporator and residual solvents were removed from non-volatile compounds using a vacuum manifold maintained at approximately 1 Torr. NMR spectra were recorded on a Bruker Advance 400 MHz, 500 MHz and 600 MHz NMR spectrometer. Chemical shifts ( $\delta$ ) are reported in parts per million (ppm) relative to residual undeuterated solvent as internal reference and coupling constants (J) are reported in hertz (Hz). Splitting patterns are indicated as follows: s = singlet; d = doublet; t = triplet; q = quartet; qn = quintet; dd = doublet of doublets; dt = doublet of triplets; tt = triplet of triplets; m = multiplet; br = broad peak. All yields reported are isolated yields. All final compounds were purified to  $\geq 95\%$  purity as determined by LC/MS analysis (using a lineal gradient of elution: 90% water in trifluoroacetic acid (containing 0.1% v/v)/10% CH<sub>3</sub>CN in trifluoroacetic acid (containing 0.1% v/v) to 10% water in trifluoroacetic acid (containing 0.1% v/v) and 90% CH<sub>3</sub>CN in trifluoroacetic acid (0.1% v/v) for 2 minutes and S2 then holding at 10% water in trifluoroacetic acid (0.1% v/v) and 90% CH<sub>3</sub>CN in trifluoroacetic acid (0.1% v/v) up to 3 minutes at a flowrate of 3 mL/min (injection volume 5  $\mu$ L and using a Waters Sunfire C18 3.5  $\mu$ m 4.6x20mm IS column)). MS mode: MS:ESI+ scan range 100-1000 daltons. PDA detection 210-400 nm. Final compounds were analyzed using UPLC (Water's Acquity (Waters Milford, MA)) coupled with an AB Sciex 6600 Triple-TOF mass spectrometer (AB Sciex Framingham, MA). A Water's Acquity HSS T3 (1.7  $\mu$ m beads, 2.1x50mm) column was used for separation. Mobile phase A was water with 0.1% formic acid and mobile phase B was acetonitrile with 0.1% formic acid. The flow rate was 0.45 mL/min and the following gradient was used from 0-0.2 minutes 5% B and increased linearly to 65% B at 5 minutes and 90% at 6.1 min and remained there for 0.4 minutes, dropped back to 5% B over 0.1 minutes and remained there for 0.4 minutes. The mass spectrometer was operated in positive ion mode. An electrospray ionization source was used with the following parameters: Ion spray voltage floating 4500 V, ion source gas 1 50 (arbitrary units), ion source gas 2 50 (arbitrary units), curtain gas 30 (arbitrary units), and temperature 500 °C



## General procedure A:

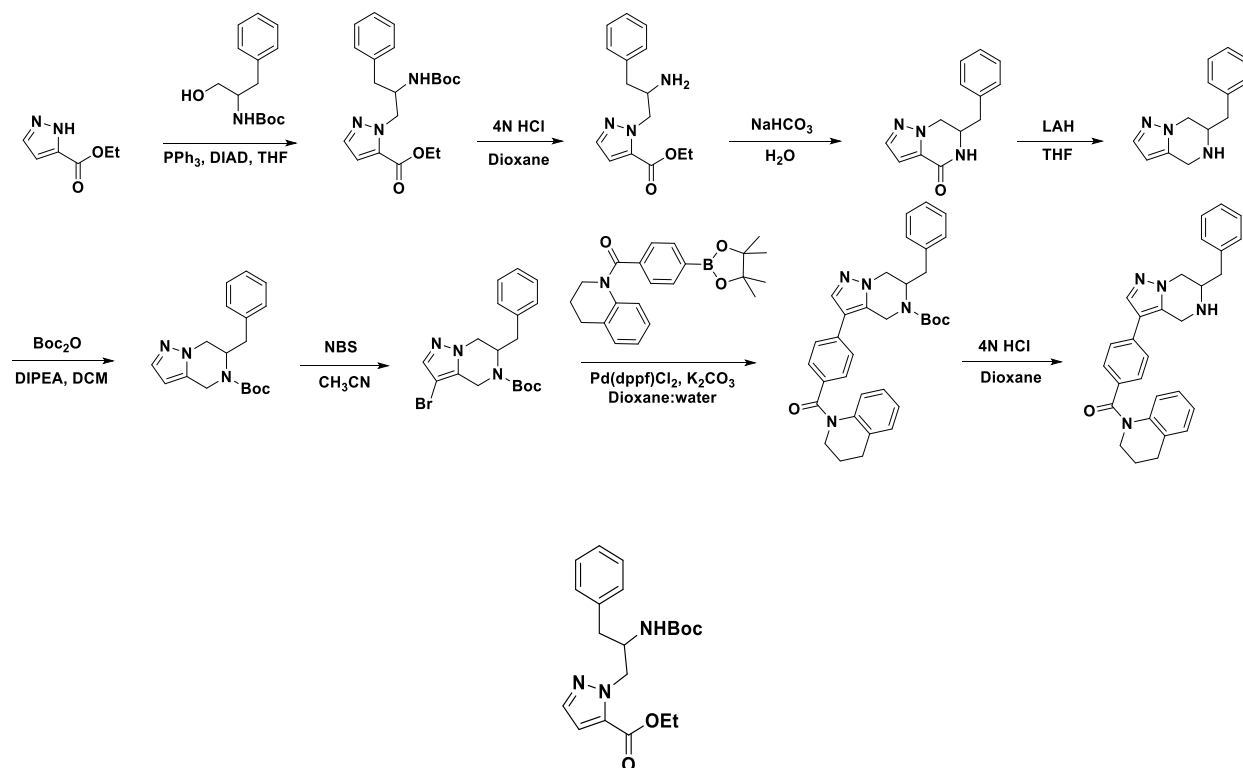

### ethyl -1-(2-((tert-butoxycarbonyl)amino)-3-phenylpropyl)-1H-pyrazole-5-carboxylate

To a solution of ethyl 1H-pyrazole-5-carboxylate (5.00 g, 35.68 mmol) and Triphenylphosphine (12.17 g, 46.38 mmol) in THF (50 mL) was added DIAD (9.38 g, 46.38 mmol, 9.11 mL) at 0 °C. After 30 minutes, a solution of tert-butyl (1-hydroxy-3-phenylpropan-2-yl)carbamate (8.97 g, 35.68 mmol) in dry THF (2 mL) was added and stirred at 25 °C for 16 hours. The mixture was concentrated and the residue was purified by chromatography on silica gel (eluted with EtOAc in petroleum ether:15%) to give ethyl-1-(2-((tert-butoxycarbonyl)amino)-3-phenylpropyl)-1H-pyrazole-5- (11.47 g, 86 % yield) as a colorless oil.

<sup>1</sup>H NMR: (400MHz, METHANOL-d<sub>4</sub>) δ ppm 7.55 - 7.46 (m, 1H), 7.31 - 7.19 (m, 5H), 6.94 - 6.80 (m, 1H), 4.74 - 4.64 (m, 1H), 4.54 - 4.48 (m, 1H), 4.40 - 4.23 (m, 3H), 2.89 - 2.62 (m, 2H), 1.38 - 1.33 (m, 3H), 1.32 - 1.20 (m, 9H).

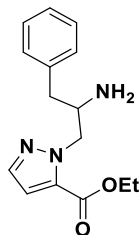

### ethyl -1-(2-amino-3-phenylpropyl)-1H-pyrazole-5-carboxylate

To a solution of ethyl 2-[2-(tert-butoxycarbonylamino)-3-phenyl-propyl]pyrazole-3-carboxylate (11.47 g, 30.71 mmol) in Dioxane (100 mL) was added HCl/Dioxane (4N solution, 50 mL) and stirred at 25 °C for 16 hours. The mixture was filtered and the filter-cake was washed with EtOAc (30 mL) to provide ethyl 2-(2-amino-3-phenyl-propyl)pyrazole-3-carboxylate (8.50 g, crude HCl salt) as a white solid. Material was used as is in the next step. UPLC-MS:  $m/z = 274.5 [M+H]^+$ .

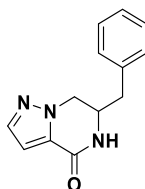

### 6-benzyl-6,7-dihydropyrazolo[1,5-a]pyrazin-4(5H)-one

A solution of ethyl 2-(2-amino-3-phenyl-propyl)pyrazole-3-carboxylate (8.50 g, 31.10 mmol, Hydrochloride) in saturated  $\text{NaHCO}_3$  in water (100 mL) was stirred at 25 °C for 16 hours. The solution was extracted with DCM (4 x 150 mL). The combined organic layers were dried over  $\text{Na}_2\text{SO}_4$ , filtered and the filtrate was concentrated to afford 6-benzyl-6,7-dihydropyrazolo[1,5-a]pyrazin-4(5H)-one (5.30 g) as a white solid and was used as is in the next step. UPLC-MS:  $m/z = 228.2 [M+H]^+$ .

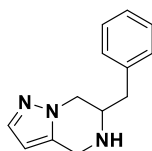

### 6-benzyl-4,5,6,7-tetrahydropyrazolo[1,5-a]pyrazine

To a solution of  $\text{LiAlH}_4$  (5.30 g, 23.32 mmol) in dry THF (100 mL) was added 6-benzyl-6,7-dihydro-5H-pyrazolo[1,5-a]pyrazin-4-one (5.30 g, 23.32 mmol) dropwise under inert atmosphere at 0 °C. After 10 minutes, the mixture was heated to 65 °C and stirred for 16 hours. The mixture was cooled down, quenched with water (3 mL), 15% NaOH in water (3 mL) and water (9 mL).

The suspension was stirred at 25 °C for 1 hour. The solution was filtered and the filtrates were concentrated to afford 6-benzyl-4,5,6,7-tetrahydropyrazolo[1,5-a]pyrazine (4.50 g) as a white solid.

UPLC-MS:  $m/z = 214.1$   $[M+H]^+$ .

$^1H$  NMR: (500MHz, METHANOL- $d_4$ )  $\delta$  ppm 7.41 (d,  $J = 2.0$  Hz, 1H), 7.37 - 7.22 (m, 5H), 6.05 (s, 1H), 4.14 (d,  $J = 16.0$  Hz, 1H), 4.04 - 4.01 (m, 1H), 3.94 (d,  $J = 16.0$  Hz, 1H), 3.74 (t,  $J = 11.5$  Hz, 1H), 3.42 - 3.78 (m, 1H), 2.99 - 2.95 (m, 1H), 2.87 - 2.78 (m, 1H).

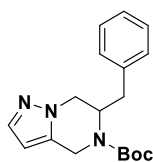

#### **tert-butyl -6-benzyl-6,7-dihydropyrazolo[1,5-a]pyrazine-5(4H)-carboxylate**

To a solution of 6-benzyl-4,5,6,7-tetrahydropyrazolo[1,5-a]pyrazine (4.50 g, 21.10 mmol) in DCM (50 mL) was added triethylamine (6.41 g, 63.30 mmol, 8.78 mL),  $Boc_2O$  (5.53 g, 25.32 mmol, 5.82 mL) at 25 °C and stirred for 2 hours. The mixture was concentrated and purified by column chromatography on silica gel (eluted with EtOAc in petroleum ether : 20%) to give tert-butyl 6-benzyl-6,7-dihydro-4H-pyrazolo[1,5-a]pyrazine-5-carboxylate (5.30 g, 55% yield over 3 steps) as a colorless oil.

LCMS:  $m/z = 256.1$   $[M+H]^+$ .

$^1H$  NMR: (500MHz, METHANOL- $d_4$ )  $\delta$  ppm 7.53 (d,  $J = 2.0$  Hz, 1H), 7.34 - 7.10 (m, 5H), 6.24 (s, 1H), 4.96 - 4.94 (m, 2H), 4.47 - 4.45 (m, 1H), 4.29 - 4.11 (m, 2H), 2.72 - 2.71 (m, 2H), 1.46 - 1.28 (m, 9H).

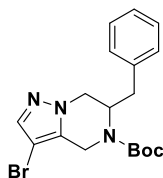

#### **tert-butyl -6-benzyl-3-bromo-6,7-dihydropyrazolo[1,5-a]pyrazine-5(4H)-carboxylate**

To a solution of tert-butyl 6-benzyl-6,7-dihydro-4H-pyrazolo[1,5-a]pyrazine-5-carboxylate (5.30 g, 16.91 mmol) in DCM (80 mL) was added NBS (3.31 g, 18.60 mmol) and was stirred at 25 °C for 16 hours. The mixture was poured into water (100 mL) and extracted with DCM (200 mL x 2).

The combined organic layers were washed with brine (100 mL), dried over Na<sub>2</sub>SO<sub>4</sub>, and filtered. The residue was concentrated and purified by column chromatography on silica (gel eluted with EtOAc in petroleum ether 30%) to give tert-butyl 6-benzyl-3-bromo-6,7-dihydro-4H-pyrazolo[1,5-a]pyrazine-5-carboxylate (4.10 g, 62% yield) as a yellow oil.

LCMS:  $m/z = 392 [M+H]^+$ .

<sup>1</sup>H NMR: (500MHz, METHANOL-d<sub>4</sub>)  $\delta$  ppm 7.56 (s, 1H), 7.35 - 7.11 (m, 5H), 5.01 - 4.88 (m, 1H), 4.86 - 4.71 (m, 1H), 4.35 - 4.11 (m, 3H), 2.73 - 2.71 (m, 2H), 1.49 - 1.25 (m, 9H).

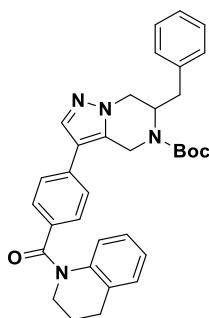

**tert-butyl-6-benzyl-3-(4-(1,2,3,4-tetrahydroquinoline-1-carbonyl)phenyl)-6,7-dihydropyrazolo[1,5-a]pyrazine-5(4H)-carboxylate**

To a solution of tert-butyl 6-benzyl-3-bromo-6,7-dihydro-4H-pyrazolo[1,5-a]pyrazine-5-carboxylate (1.00 g, 2.55 mmol) in Dioxane/H<sub>2</sub>O (4:1, 20 mL) was added 3,4-dihydro-2H-quinolin-1-yl-[4-(4,4,5,5-tetramethyl-1,3,2-dioxaborolan-2-yl)phenyl]methanone (1.85 g, 5.10 mmol), K<sub>2</sub>CO<sub>3</sub> (1.06 g, 7.65 mmol), Pd(dppf)Cl<sub>2</sub> (93.26 mg, 127.46  $\mu$ mol) under nitrogen atmosphere and was stirred at 75 °C for 2 hours. The mixture was concentrated and purified by chromatography on silica gel (eluted with EtOAc in petroleum ether: 40%) to give tert-butyl 6-benzyl-3-(4-(1,2,3,4-tetrahydroquinoline-1-carbonyl)phenyl)-6,7-dihydropyrazolo[1,5-a]pyrazine-5(4H)-carboxylate (1.16 g, 83% yield) as a yellow solid.

LCMS:  $m/z = 549.4 [M+H]^+$ .

<sup>1</sup>H NMR: (400MHz, METHANOL-d<sub>4</sub>)  $\delta$  ppm  $\delta = 7.87$  (s, 1H), 7.73 - 7.55 (m, 1H), 7.46 - 7.40 (m, 3H), 7.35 - 7.15 (m, 6H), 7.08 - 6.83 (m, 2H), 6.80 - 6.70 (m, 1H), 4.98 - 4.90 (m, 1H), 4.67 - 4.55 (m, 1H), 4.36 - 4.16 (m, 2H), 3.96 - 3.87 (m, 2H), 3.75 (s, 1H), 2.93 - 2.74 (m, 4H), 2.12 - 2.03 (m, 2H), 1.47 - 1.27 (m, 9H).

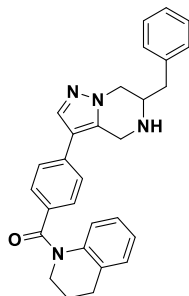

**(4-(6-benzyl-4,5,6,7-tetrahydropyrazolo[1,5-a]pyrazin-3-yl)phenyl)(3,4-dihydroquinolin-1(2H)-yl)methanone**

A solution of tert-butyl 6-benzyl-3-[4-(3,4-dihydro-2H-quinoline-1-carbonyl)phenyl]-6,7-dihydro-4H-pyrazolo[1,5-a]pyrazine-5-carboxylate (1.16 g, 2.11 mmol) in 4N HCl in Dioxane (20 mL) was stirred for 3 hours at room temperature. The mixture was concentrated to give [4-(6-benzyl-4,5,6,7-tetrahydropyrazolo[1,5-a]pyrazin-3-yl)phenyl]-(3,4-dihydro-2H-quinolin-1-yl)methanone (1.30 g, crude, HCl salt) as a yellow solid, and used as is in the next step. UPLC-MS:  $m/z = 449.2$   $[M+H]^+$ .

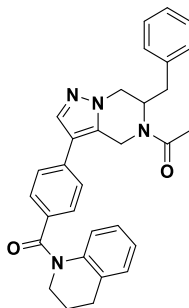

**1-(6-benzyl-3-(4-(1,2,3,4-tetrahydroquinoline-1-carbonyl)phenyl)-6,7-dihydropyrazolo[1,5-a]pyrazin-5(4H)-yl)ethan-1-one BIO-1967878**

To a solution of [4-(6-benzyl-4,5,6,7-tetrahydropyrazolo[1,5-a]pyrazin-3-yl)phenyl]-(3,4-dihydro-2H-quinolin-1-yl)methanone (100 mg, 223  $\mu\text{mol}$ ), TEA (0.1 mL) in DCM (1 mL) was added acetyl chloride (55 mg, 701  $\mu\text{mol}$ , 50  $\mu\text{L}$ ) at 0 °C and was stirred at 25 °C for 2 hours. The mixture was concentrated, and the residue was purified by prep-HPLC (column: Phenomenex Synergi C18 150\*30mm\*4 $\mu\text{m}$ ; condition: water (0.05% HCl)-ACN; from 55%-75%) to give 1-[6-benzyl-3-[4-(3,4-dihydro-2H-quinoline-1-carbonyl)phenyl]-6,7-dihydro-4H-pyrazolo[1,5-a]pyrazin-5-yl]ethanone (48 mg, 44% yield) as a white solid.

<sup>1</sup>H NMR: (500MHz, METHANOL-d<sub>4</sub>) δ ppm 7.94 - 7.89 (m, 1H), 7.48 - 7.45 (m, 2H), 7.44 - 7.40 (m, 2H), 7.34 - 7.26 (m, 3H), 7.23 - 7.15 (m, 3H), 7.03 (t, J = 7.5 Hz, 1H), 6.90 - 6.89 (m, 1H), 6.76 (br s, 1H), 5.49 - 5.33 (m, 1H), 4.95 - 4.90 (m, 1H), 4.74 - 4.66 (m, 1H), 4.36 (s, 2H), 4.10 - 3.91 (m, 2H), 2.91 - 2.64 (m, 4H), 2.16 (s, 1H), 2.09 - 2.04 (m, 2H), 1.83 (m, 2H).

HPLC: purity: 99.4 %.

UPLC-MS: m/z = 491.1 [M+H]<sup>+</sup>.

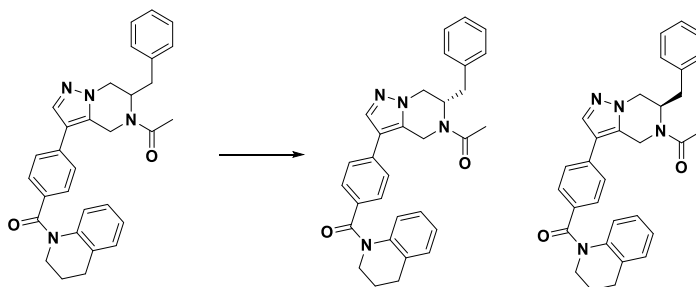

**(S)-1-(6-benzyl-3-(4-(1,2,3,4-tetrahydroquinoline-1-carbonyl)phenyl)-6,7-dihydropyrazolo[1,5-a]pyrazin-5(4H)-yl)ethan-1-one BIO-1975900**

1-(6-benzyl-3-(4-(1,2,3,4-tetrahydroquinoline-1-carbonyl)phenyl)-6,7-dihydropyrazolo[1,5-a]pyrazin-5(4H)-yl)ethan-1-one (25 mg) was separated by chiral SFC using CHIRALPAK IB 30x250mm, 5μm Method: 40% EtOH w/ 0.1% DEA in CO<sub>2</sub> (flow rate: 100 mL/min, ABPR 120 bar, MBPR 40psi, column temp 40°C). First elution product R<sub>f</sub> E1: 3.05min provided BIO-1975900 (6.9 mg, %ee = 100%). Second elution product R<sub>f</sub> E2: 3.60min provided BIO-1975902 (8.2 mg, %ee = 97%). The stereochemistry of the products was not determined but was assigned based on the biological activities observed in our program for this subseries. Analogs prepared chirally as the (S)-configuration displayed activity while the match pair (R)-configuration were inactive.

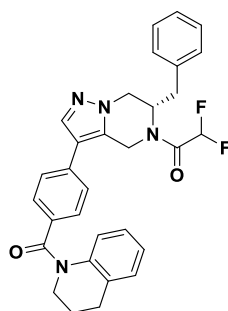

**(S)-1-(6-benzyl-3-(4-(1,2,3,4-tetrahydroquinoline-1-carbonyl)phenyl)-6,7-dihydropyrazolo[1,5-a]pyrazin-5(4H)-yl)-2,2-difluoroethan-1-one BIO-2008218**

(S)-(4-(6-benzyl-4,5,6,7-tetrahydropyrazolo[1,5-a]pyrazin-3-yl)phenyl)(3,4-dihydroquinolin-1(2H)-yl)methanone was prepared following the general procedure A using (S)-2-amino-3-phenylpropan-1-ol in the first step.

To a solution of [4-[(6S)-6-benzyl-4,5,6,7-tetrahydropyrazolo[1,5-a]pyrazin-3-yl]phenyl]-(3,4-dihydro-2H-quinolin-1-yl)methanone (120 mg, 267  $\mu\text{mol}$ ) in EtOAc (2 mL) was added TEA (81 mg, 802  $\mu\text{mol}$ ), T<sub>3</sub>P (170 mg, 267  $\mu\text{mol}$ , 50% purity) and 2,2-difluoroacetic acid (39 mg, 401  $\mu\text{mol}$ , 25  $\mu\text{L}$ ). The mixture was stirred at 20°C for 16 hours, then was concentrated and purified by prep-HPLC (column:Phenomenex Synergi C18 150\*30mm\*4 $\mu\text{m}$ ; condition : water (0.05% HCl)-ACN; from : 50%-80%) to give 1-[(6S)-6-benzyl-3-[4-(3,4-dihydro-2H-quinoline-1-carbonyl)phenyl]-6,7-dihydro-4H-pyrazolo[1,5-a]pyrazin-5-yl]-2,2-difluoro-ethanone (21 mg, 15% yield) as white solid.

<sup>1</sup>HNMR: (500 MHz, METHANOL-d<sub>4</sub>) ppm: 7.87-7.94 (m, 1H), 7.39-7.52 (m, 4H), 7.15-7.36 (m, 6H), 7.04 (t, J=7.50 Hz, 1H), 6.84-6.94 (m, 1H), 6.69-6.83 (m, 1H), 6.18-6.65 (m, 1H), 4.90-5.48 (m, 2H), 4.69-4.77 (m, 1H), 4.19-4.33 (m, 2H), 3.90 (t, J=6.50 Hz, 2H), 2.81-3.01 (m, 4H), 2.04-2.10 (m, 2H).

UPLC-MS: m/z = 527.4 [M+H]<sup>+</sup>.

HPLC: purity: 95.9 %.

SFC: purity: %ee = 100.00 %, Rt = 6.26 min. Chiralpak AD-3 150 Å4.6mm I.D., 3 $\mu\text{m}$

Mobile phase: 40% of ethanol (0.05% DEA) in CO<sub>2</sub> Flow rate: 2.5mL/min

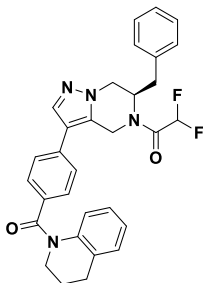

**(R)-1-(6-benzyl-3-(4-(1,2,3,4-tetrahydroquinoline-1-carbonyl)phenyl)-6,7-dihydropyrazolo[1,5-a]pyrazin-5(4H)-yl)-2,2-difluoroethan-1-one BIO-2008219**

Was prepared similarly to BIO-2008218 using (R)-2-amino-3-phenylpropan-1-ol and general procedure A. purity: ee = 100.00 %, Rt = 4.66 min. Chiralpak AD-3 150 Å4.6mm I.D., 3µm Mobile phase: 40% of ethanol (0.05% DEA) in CO<sub>2</sub> Flow rate: 2.5mL/min

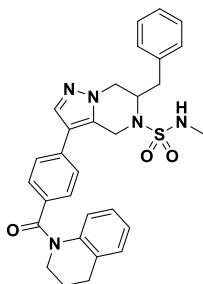

**6-benzyl-N-methyl-3-(4-(1,2,3,4-tetrahydroquinoline-1-carbonyl)phenyl)-6,7-dihydropyrazolo[1,5-a]pyrazine-5(4H)-sulfonamide BIO-2005981**

To a solution of (4-(6-benzyl-4,5,6,7-tetrahydropyrazolo[1,5-a]pyrazin-3-yl)phenyl)(3,4-dihydroquinolin-1(2H)-yl)methanone (40 mg, 0.089 mmol) and TEA (13.5 mg, 0.13 mmol) in THF (1.0 mL) was added methylsulfamoyl chloride (12 mg, 0.089 mmol) at 0 °C. The reaction mixture was stirred at 0 °C for 2 hours. The mixture was concentrated and purified by prep-HPLC (Column: Phenomenex Synergi C18 150\*30mm\*4µm; condition: water (0.05% HCl)-ACN, 51~71%; FlowRate (ml/min): 25) to give 6-benzyl-N-methyl-3-(4-(1,2,3,4-tetrahydroquinoline-1-carbonyl)phenyl)-6,7-dihydropyrazolo[1,5-a]pyrazine-5(4H)-sulfonamide (14 mg, 27% yield, HCl salt) as a white solid.

UPLC-MS:  $m/z = 542.4 [M+H]^+$ .

HPLC: purity = 100.00%.

<sup>1</sup>H NMR (500 MHz, METHANOL-d<sub>4</sub>) δ ppm: 7.90 (s, 1H), 7.39-7.46 (m, 4H), 7.30-7.35 (m, 2H), 7.20-7.29 (m, 4H), 7.02-7.06 (m, 1H), 6.67-6.84 (m, 1H), 6.73-6.80 (m, 1H), 4.90-4.92 (m, 1H), 4.68 (d,  $J=17.0$  Hz, 1H), 4.54-4.61 (m, 1H), 4.25-4.31 (m, 1H), 4.15-4.21 (m, 1H), 3.88-3.92 (m, 2H), 3.04-3.10 (m, 1H), 2.86-2.96 (m, 3H), 2.28 (s, 3H), 2.04-2.10 (m, 2H).



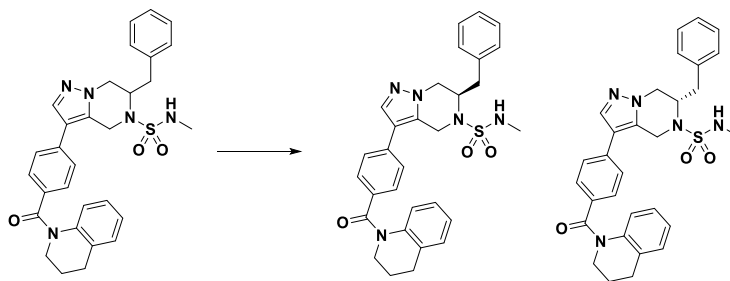

**(R)-6-benzyl-N-methyl-3-(4-(1,2,3,4-tetrahydroquinoline-1-carbonyl)phenyl)-6,7-dihydropyrazolo[1,5-a]pyrazine-5(4H)-sulfonamide BIO-2006664**

**(S)-6-benzyl-N-methyl-3-(4-(1,2,3,4-tetrahydroquinoline-1-carbonyl)phenyl)-6,7-dihydropyrazolo[1,5-a]pyrazine-5(4H)-sulfonamide BIO-2006661**

The racemic 6-benzyl-N-methyl-3-(4-(1,2,3,4-tetrahydroquinoline-1-carbonyl)phenyl)-6,7-dihydropyrazolo[1,5-a]pyrazine-5(4H)-sulfonamide (30 mg, 0.055 mmol) was separated by chiral SFC (Condition: DAICEL CHIRALCEL OD-H (250mm\*30mm,5um); Column: 0.1%NH<sub>3</sub>H<sub>2</sub>O EtOH; Begin B: 50%; End B: 50%; Flow Rate (ml/min): 70) to give the desired product. The stereochemistry was not assigned but derived from SAR observed in our program and BIO-2008218 data.

E1 (BIO-2006661), 11.7 mg as a white solid. Rt = 1.97 min.

LCMS: m/z = 542.3 [M+H]<sup>+</sup>. HPLC: Purity: 100%. SFC: ee = 98.3%.

E2 (BIO-2006664), 6.9 mg as a white solid. Rt = 2.35 min

LCMS: m/z = 542.3 [M+H]<sup>+</sup>. HPLC: Purity: 100%. SFC: ee = 100%.

**BIO-1966561, BIO-2007817 and BIO-2007818** were prepared as described in *iScience*, 2022, 25(1), 103650.

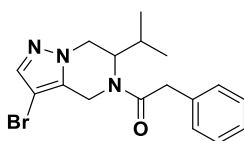

**1-(3-bromo-6-isopropyl-6,7-dihydropyrazolo[1,5-a]pyrazin-5(4H)-yl)-2-phenylethan-1-one**

Material was prepared using methods described in *iScience*, 2022, 25(1), 103650 using racemic 2-amino-3-methylbutan-1-ol.

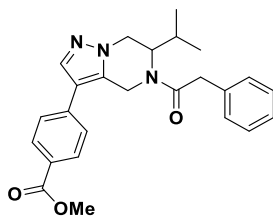

**methyl (R)-4-(6-isopropyl-5-(2-phenylacetyl)-4,5,6,7-tetrahydropyrazolo[1,5-a]pyrazin-3-yl)benzoate**

A solution of 1-(3-bromo-6-isopropyl-6,7-dihydro-4H-pyrazolo[1,5-a]pyrazin-5-yl)-2-phenylethanone (1.15 g, 3.17 mmol), (4-methoxycarbonylphenyl)boronic acid (0.86 g, 4.76 mmol), Pd(PPh<sub>3</sub>)<sub>4</sub> (0.18 g, 158.73 μmol) and K<sub>2</sub>CO<sub>3</sub> (2 M in water, 4.8 mL) in dioxane:water (30:10 mL) was stirred at 85°C for 2h. The solution was cooled down, diluted in water followed by extraction with DCM. The combined organic layers were dried over Na<sub>2</sub>SO<sub>4</sub>, filtered and concentrated. The residue was purified by column chromatography on silica gel (0 to 100% AcOEt in heptane) to afford methyl 4-[6-isopropyl-5-(2-phenylacetyl)-6,7-dihydro-4H-pyrazolo[1,5-a]pyrazin-3-yl]benzoate (1.10 g, 83 % yield).

UPLC-MS: m/z = 418 [M+H]<sup>+</sup>.

<sup>1</sup>H NMR (500 MHz, DMSO-d<sub>6</sub>) δ = 8.05 - 7.92 (m, 3H), 7.70 - 7.57 (m, 2H), 7.38 - 7.16 (m, 5H), 5.61 - 5.27 (m, 1H), 4.77 - 4.59 (m, 1H), 4.45 - 3.83 (m, 8H), 1.82 - 1.70 (m, 1H), 1.63 - 1.46 (m, 1H), 0.99 - 0.87 (m, 3H), 0.76 (m, 3H).

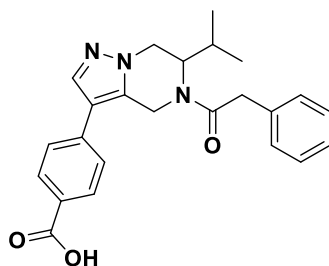

**4-(6-isopropyl-5-(2-phenylacetyl)-4,5,6,7-tetrahydropyrazolo[1,5-a]pyrazin-3-yl)benzoic acid**

A solution of methyl 4-[6-isopropyl-5-(2-phenylacetyl)-6,7-dihydro-4H-pyrazolo[1,5-a]pyrazin-3-yl]benzoate (1.05 g, 2.51 mmol) and lithium hydroxide (1M in water, 5 mL) in THF:MeOH:water (2:1:1, 25 mL) was stirred at 55°C overnight. The solution was cooled down and diluted in water (pH 14). The aqueous layer was washed with DCM (2x), then was acidified to pH2 with 6N HCl followed by extraction with DCM. The combined organic layers were dried

over Na<sub>2</sub>SO<sub>4</sub>, filtered and concentrated to provide 4-[6-isopropyl-5-(2-phenylacetyl)-6,7-dihydro-4H-pyrazolo[1,5-a]pyrazin-3-yl]benzoic acid (915 mg, 90% yield) which was used crude in the next step. UPLC-MS: m/z = 404 [M+H]<sup>+</sup>.

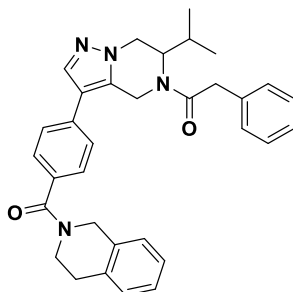

**1-(6-isopropyl-3-(4-(1,2,3,4-tetrahydroisoquinoline-2-carbonyl)phenyl)-6,7-dihydropyrazolo[1,5-a]pyrazin-5(4H)-yl)-2-phenylethan-1-one BIO-1967660**

A solution of 4-[6-isopropyl-5-(2-phenylacetyl)-6,7-dihydro-4H-pyrazolo[1,5-a]pyrazin-3-yl]benzoic acid (15 mg, 37  $\mu$ mol), 1,2,3,4-tetrahydroisoquinoline (9.9 mg, 74.3  $\mu$ mol), DIPEA (26  $\mu$ L, 148.7  $\mu$ mol) and HATU (17 mg, 44.6  $\mu$ mol) in DCM (2 mL) was stirred at room temperature for 3h. The solution was diluted in water followed by extraction with DCM. The combined organic layers were filtered through a 0.45 $\mu$ m filter, then was evaporated and purified by prep HPLC (Waters SunFire Prep C18 5 $\mu$ m OBD 19x100mm, 5 to 70% CH<sub>3</sub>CN in water, TFA buffer) to afford 1-[3-[4-(3,4-dihydro-1H-isoquinoline-2-carbonyl)phenyl]-6-isopropyl-6,7-dihydro-4H-pyrazolo[1,5-a]pyrazin-5-yl]-2-phenyl-ethanone (16 mg, 82% yield).

UPLC-MS: m/z = 519 [M+H]<sup>+</sup>.

<sup>1</sup>H NMR (500 MHz, DMSO-d<sub>6</sub>)  $\delta$  = 7.99 (m, 1H), 7.71 - 7.15 (m, 13H), 5.67 - 5.34 (m, 1H), 4.95 - 2.86 (m, 12H), 1.88 - 1.51 (m, 1H), 1.09 - 0.88 (m, 3H), 0.82 m, 3H).

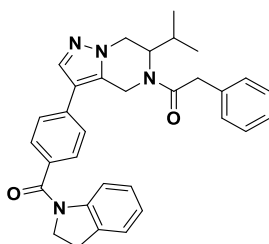

**1-(3-(4-(indoline-1-carbonyl)phenyl)-6-isopropyl-6,7-dihydropyrazolo[1,5-a]pyrazin-5(4H)-yl)-2-phenylethan-1-one BIO-1979167**

A solution of 4-[6-isopropyl-5-(2-phenylacetyl)-6,7-dihydro-4H-pyrazolo[1,5-a]pyrazin-3-yl]benzoic acid (15 mg, 37.1  $\mu\text{mol}$ ), indoline (9 mg, 74.3  $\mu\text{mol}$ ), DIPEA (20  $\mu\text{l}$ , 111.5  $\mu\text{mol}$ ) and HATU (21 mg, 55.8  $\mu\text{mol}$ ) in DMF (0.1 M) was stirred at room temperature for 16h. The solvent was removed under vacuum. The residue was diluted in AcOEt (3 mL), washed with water then was concentrated under vacuum. The residue was purified by prep HPLC (Waters SunFire Prep C18 5 $\mu\text{m}$  OBD 19x100mm, 20 to 75%  $\text{CH}_3\text{CN}$  in water, TFA buffer) to afford 1-(3-(4-(indoline-1-carbonyl)phenyl)-6-isopropyl-6,7-dihydropyrazolo[1,5-a]pyrazin-5(4H)-yl)-2-phenylethan-1-one (15.2 mg, 66% yield, TFA salt).

UPLC-MS:  $m/z = 505.2$   $[\text{M}+\text{H}]^+$ .

$^1\text{H}$  NMR (500 MHz,  $\text{DMSO}-d_6$ )  $\delta = 8.12 - 7.50$  (m, 6H), 7.41 - 6.92 (m, 8H), 5.61 - 5.30 (m, 1H), 4.80 - 3.05 (m, 10H), 1.83 - 1.49 (m, 1H), 1.01 - 0.88 (m, 3H), 0.77 (m, 3H).

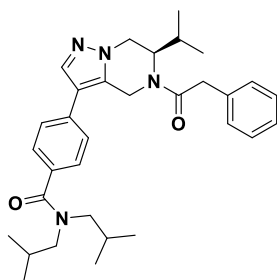

**(R)-N,N-diisobutyl-4-(6-isopropyl-5-(2-phenylacetyl)-4,5,6,7-tetrahydropyrazolo[1,5-a]pyrazin-3-yl)benzamide BIO-1983977**

A solution of 4-[6-isopropyl-5-(2-phenylacetyl)-6,7-dihydro-4H-pyrazolo[1,5-a]pyrazin-3-yl]benzoic acid (15 mg, 37.1  $\mu\text{mol}$ ), N-isobutyl-2-methyl-propan-1-amine (9 mg, 74.3  $\mu\text{mol}$ ), DIPEA (20  $\mu\text{l}$ , 111.5  $\mu\text{mol}$ ) and HATU (21 mg, 55.8  $\mu\text{mol}$ ) in DMF (0.1 M) was stirred at room temperature for 16h. The solvent was removed under vacuum. The residue was diluted in AcOEt (3 mL), washed with water then was concentrated under vacuum. The residue was purified by prep HPLC (Waters SunFire Prep C18 5 $\mu\text{m}$  OBD 19x100mm, 20 to 75%  $\text{CH}_3\text{CN}$  in water, TFA buffer) to afford N,N-diisobutyl-4-(6-isopropyl-5-(2-phenylacetyl)-4,5,6,7-tetrahydropyrazolo[1,5-a]pyrazin-3-yl)benzamide (19 mg, 70% yield).

UPLC-MS:  $m/z = 515.3 [M+H]^+$ .

$^1\text{H}$  NMR (500 MHz, DMSO- $d_6$ )  $\delta = 7.92$  (d,  $J = 1.2$  Hz, 1H), 7.61 - 7.46 (m, 2H), 7.42 - 6.89 (m, 7H), 5.57 - 5.29 (m, 1H), 4.75 - 4.58 (m, 1H), 4.43 - 3.83 (m, 5H), 3.43 - 3.00 (m, 2H), 2.79 - 2.51 (m, 2H), 2.13 - 1.45 (m, 3H), 1.06 - 0.58 (m, 18H).

N,N-diisobutyl-4-(6-isopropyl-5-(2-phenylacetyl)-4,5,6,7-tetrahydropyrazolo[1,5-a]pyrazin-3-yl)benzamide (19 mg) was separated by chiral SFC using CHIRALPAK AD-H 30x250mm, 5 $\mu$ m, Method: 40% MeOH w/ 0.1% DEA in CO<sub>2</sub> (flow rate: 100 mL/min, ABPR 120bar, MBPR 40psi, column temp 40°C). First elution product Rf E1: 1.89 min provided BIO-1983977 (2.2 mg, %ee = 100%). Second elution product Rf E2: 2.73 min provided BIO-1983978 (2.4 mg, %ee = 100%). The stereochemistry of the products was not determined but was assigned based on the biological activities observed in our program for this subseries. Analogs prepared chirally as the (R)-configuration displayed activity while the match pair (S)-configuration were inactive.
